# Supplementary material
Source: PubMed Central journal article supplement (PMC4084870)

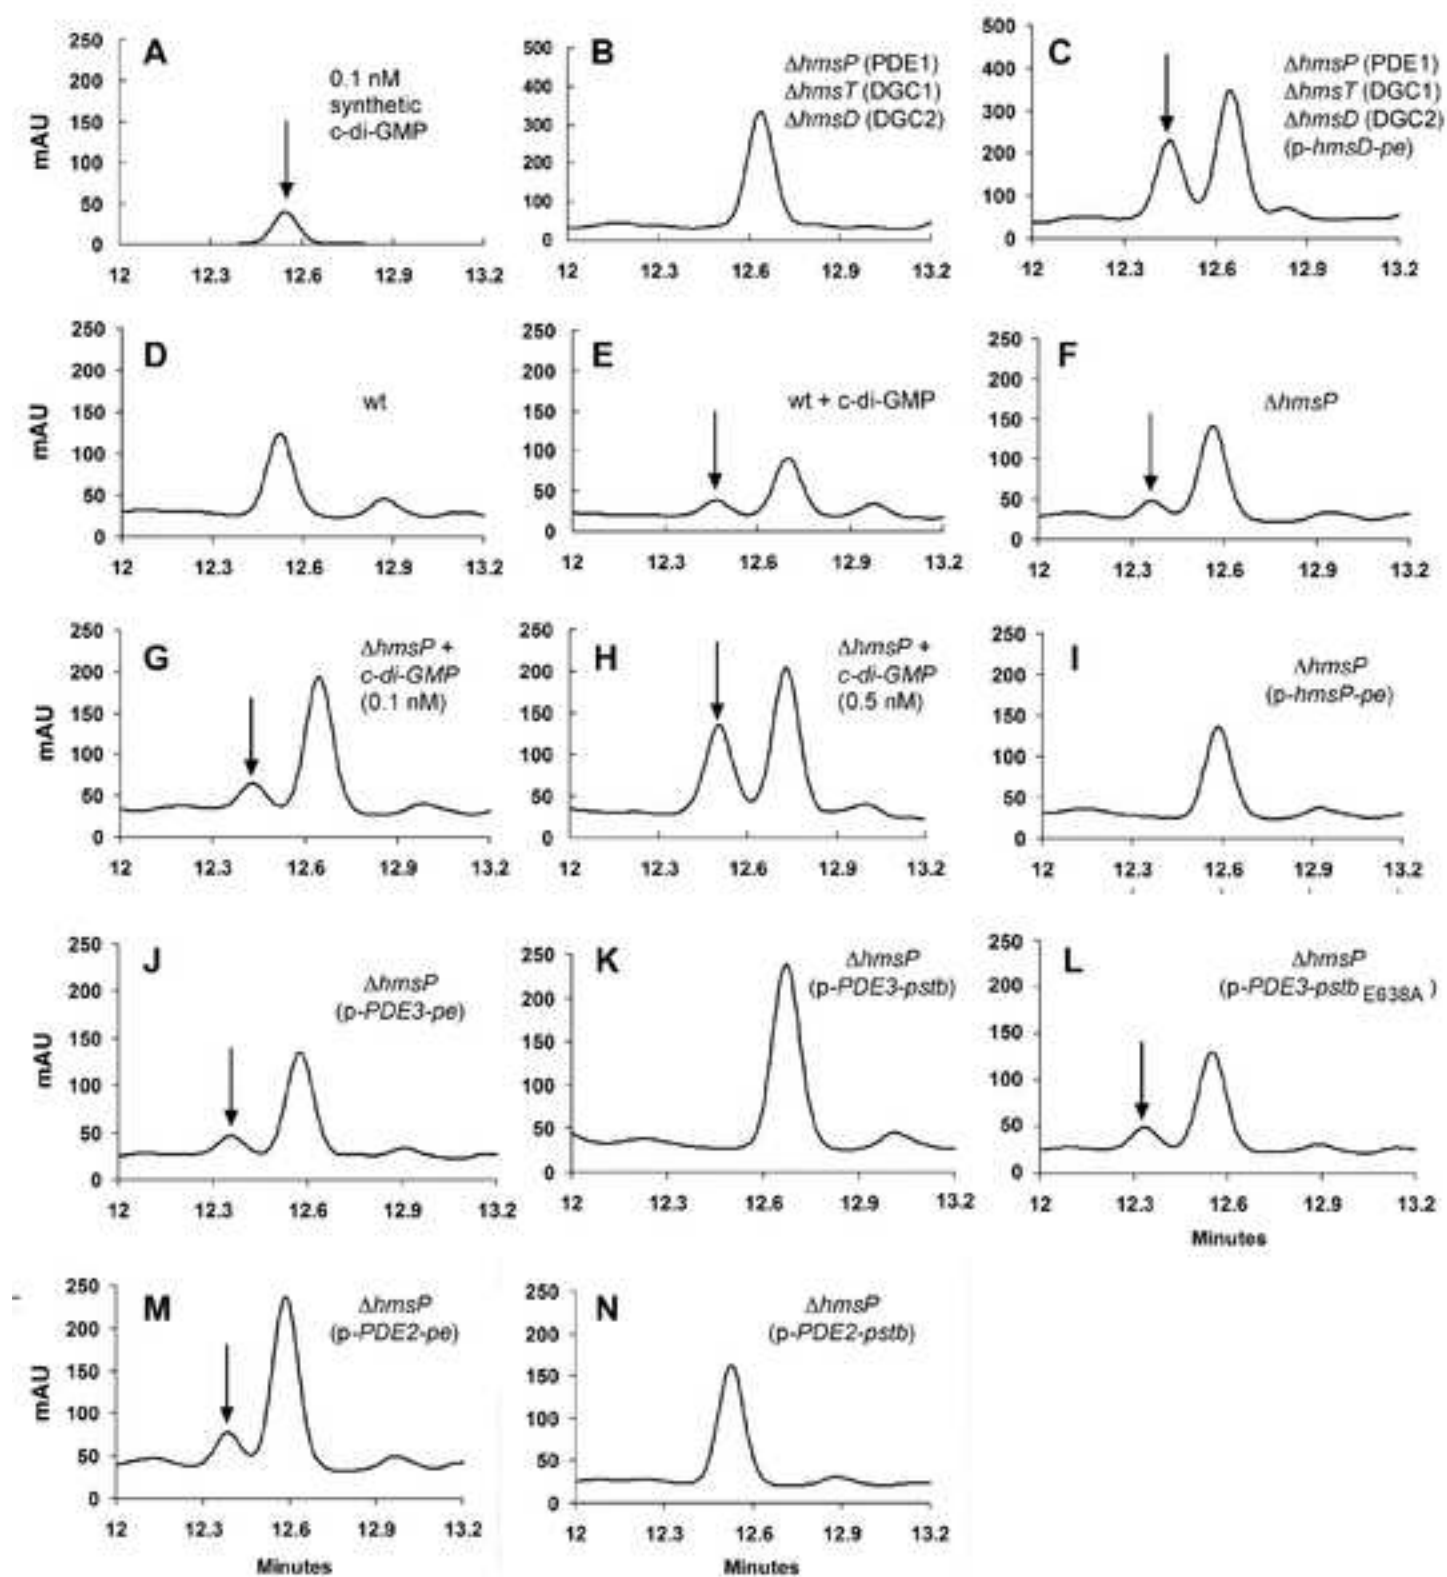

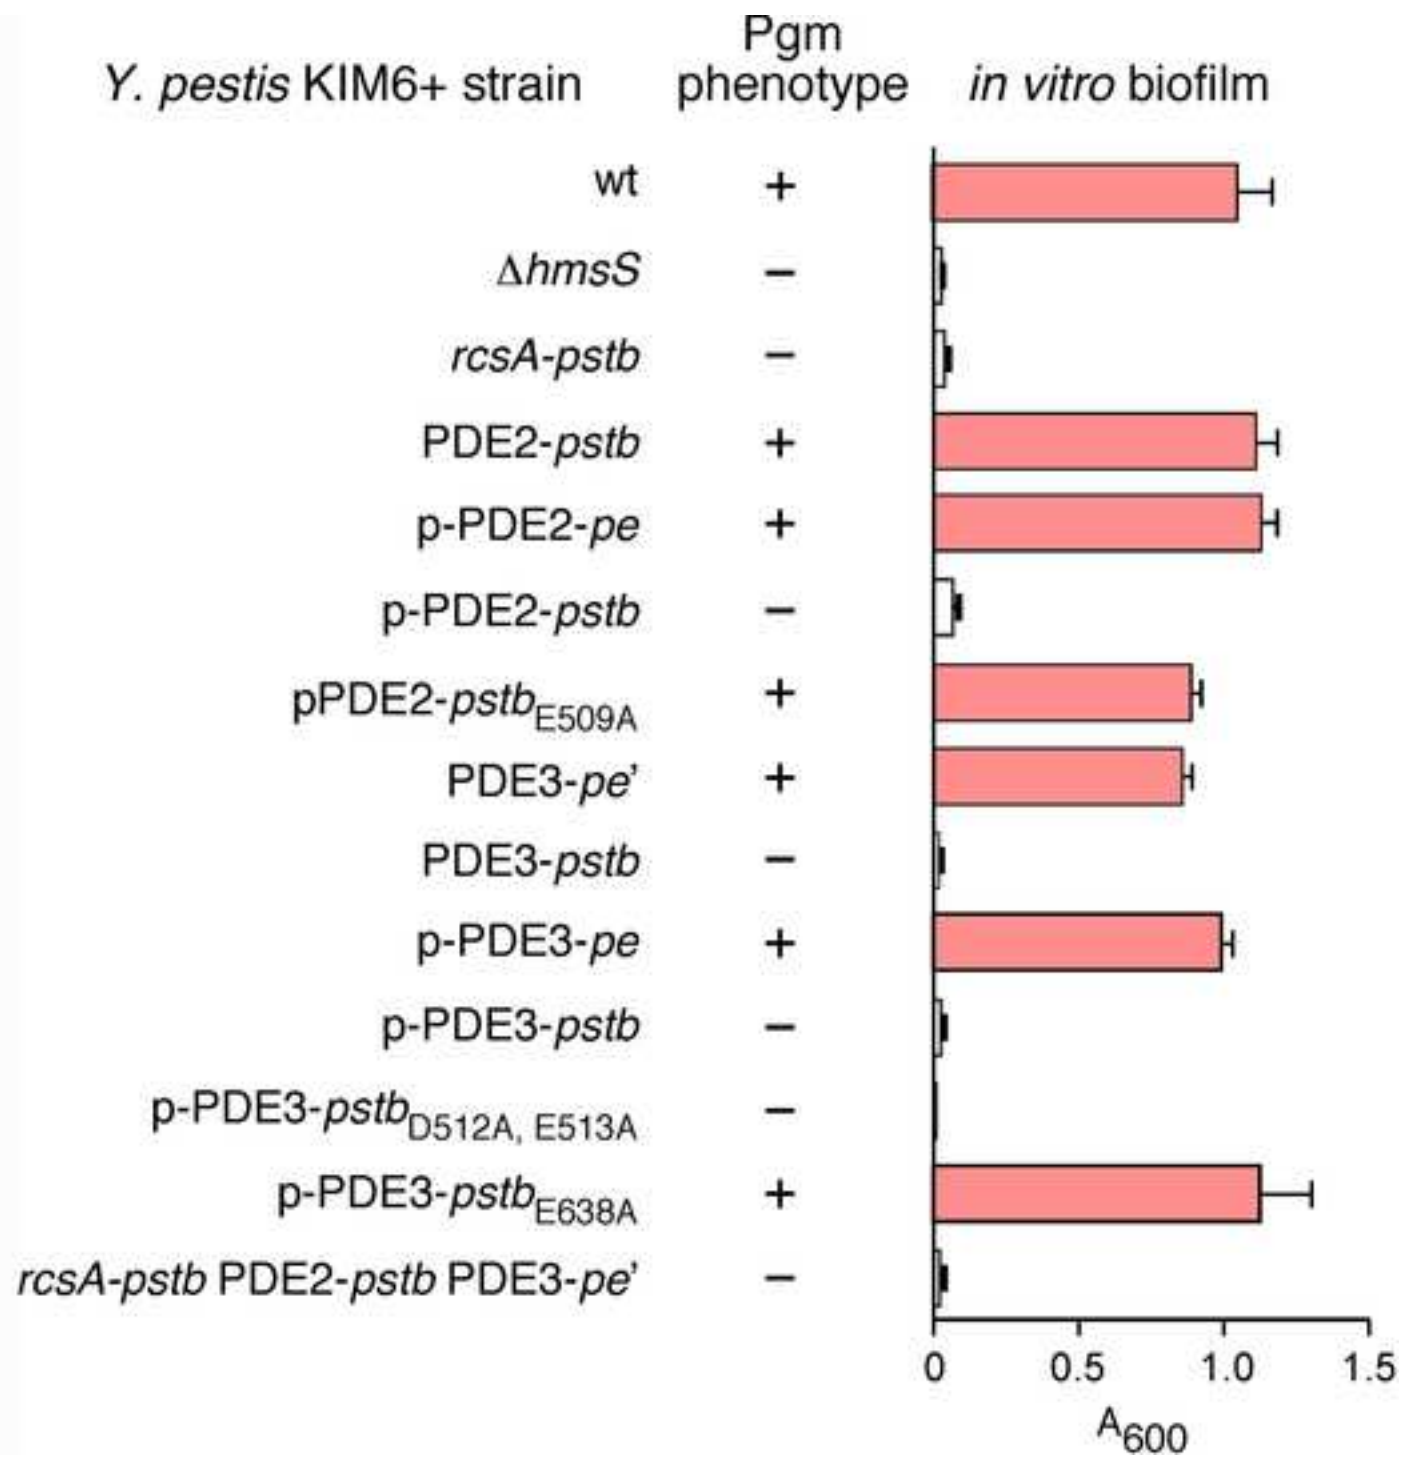

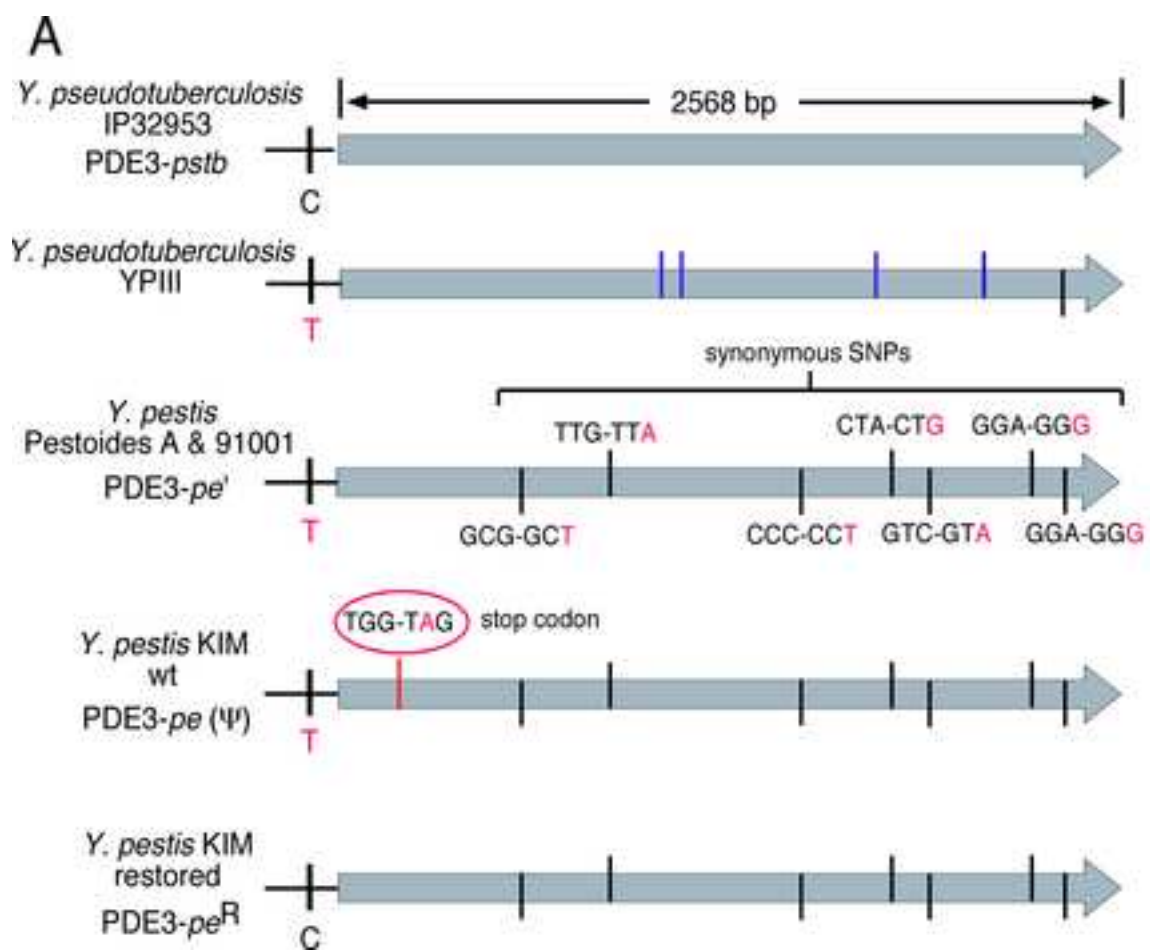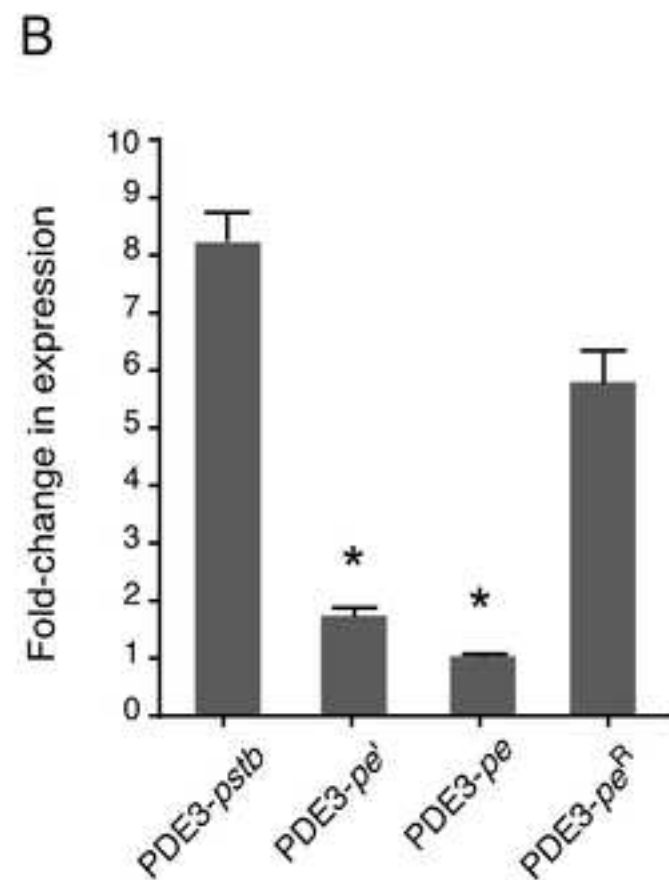

Supplement: NIHMS586763-supplement-02.pdf [file NIHMS586763-supplement-02.pdf]
